# Supplementary material for: Adsorption Kinetics of Imidacloprid, Acetamiprid and Methomyl Pesticides in Aqueous Solution onto Eucalyptus Woodchip Derived Biochar
Source: MDPI journal article supplement (doi:10.3390/min12050528), 2022-04-24
Supplement: s1 [file s1]

# Adsorption Kinetics of Imidacloprid, Acetamiprid and Methomyl Pesticides in Aqueous Solution onto Eucalyptus Woodchip Derived Biochar

Assadawoot Srikhaow <sup>1</sup>, Wasitthi Chaengsawang <sup>1</sup>, Tanongkiat Kiatsiriroat <sup>2</sup>, Puangrat Kajitvichyanukul <sup>3,4 \*</sup> and Siwaporn M. Smith <sup>1,\*</sup>

<sup>1</sup> Center of Sustainable Energy and Green Materials and Department of Chemistry, Faculty of Science, Mahidol University, 999 Phuttamonthon Sai 4 Road, Salaya 73170, Thailand; assadawoot.sri@gmail.com (A.S.); cw.wasitthi@gmail.com (W.C.)

<sup>2</sup> Department of Mechanical Engineering, Faculty of Engineering, Chiang Mai University, 239 Huay Kaew Road, Muang District, Chiang Mai 50200, Thailand; tanong@dome.eng.cmu.ac.th

<sup>3</sup> Department of Environmental Engineering, Faculty of Engineering, Chiang Mai University, 239 Huay Kaew Road, Muang District, Chiang Mai 50200, Thailand

<sup>4</sup> Sustainable Engineering Research Center for Pollution and Environmental Management, Faculty of Engineering, Chiang Mai University, 239 Huay Kaew Road, Muang District, Chiang Mai 50200, Thailand

\* Correspondence: puangrat.k@cmu.ac.th (P.K.); siwaporn.smi@mahidol.edu (S.M.S.); Tel.: +66-61-6598715 (P.K.); +66-93-5939449 (S.M.S.)

## Adsorption Isotherms

Two-parameter adsorption isotherms models including Dubinin-Radushkevich and Temkin models were also applied to simulate the experimental data for the adsorption isotherm interpretation.

The Dubinin-Radushkevich adsorption isotherm is generally applied to express the adsorption mechanism with the distribution of Gaussian energy on the heterogeneous surface [1]. This model is commonly used to describe the adsorption of vapors and gases on microporous sorbents. The difference of the Dubinin-Radushkevich isotherm model from Langmuir and Freundlich isotherm models is that the Dubinin-Radushkevich model is a semiempirical equation where the adsorption of this model occurred through pore filling mechanism and multilayer characteristic. This isotherm is expressed as follow:

$$q_e = q_{m,DR} \exp[-K_{DR}\epsilon_{DR}^2] \quad (S1)$$

where  $q_e$  is the equilibrium adsorption capacity ( $\text{mg g}^{-1}$ ),  $q_{m,DR}$  is the Dubinin-Radushkevich maximum adsorption capacity ( $\text{mg g}^{-1}$ ),  $K_{DR}$  is a constant related to the adsorption energy ( $\text{mol}^2 \text{J}^{-2}$ ) and  $\epsilon$  is Polanyi potential ( $\text{J mol}^{-1}$ ). The equation used for  $\epsilon$  calculation is expressed as follow:

$$\epsilon = RT \ln (1 + 1/C_e) \quad (S2)$$

where  $R$ ,  $T$  and  $C_e$  are the gas constant ( $8.3145 \text{ J mol}^{-1}$ ), absolute temperature ( $K$ ) and equilibrium concentration of adsorbate ( $\text{mg L}^{-1}$ ), respectively.

The mean free energy of adsorption ( $E$ ,  $\text{J mol}^{-1}$ ) is can be calculated as shown in Equation (S3), which is defined as the change of free energy when one mole ion transfer to the surface of adsorbent from infinite distance in the solution.

$$E = 1/(2K_{DR})^{0.5} \quad (S3)$$

The Temkin adsorption isotherm model contains a factor that considers the effects of some adsorbent-adsorbate interactions [1]. Due to the interactions between adsorbate and adsorbent, the heat of adsorption of all molecules in the adsorption layer possibly decreases linearly with the coverage [2]. Temkin model is absolutely well for predicting the

gas phase equilibrium but this model is commonly appropriate to describe complex adsorption system including liquid-phase adsorption isotherms.

The non-linear expression of Temkin isotherm is given as follow:

$$q_e = B \ln (K_T C_e)$$

$$B = RT/b_T$$

Where  $B$ ,  $K_T$  and  $b_T$  are the Temkin isotherm constant corresponded to heat of adsorption, Temkin isotherm equilibrium binding constant ( $L \text{ mg}^{-1}$ ) and Temkin sorption heat constant ( $J \text{ mol}^{-1}$ ), respectively.

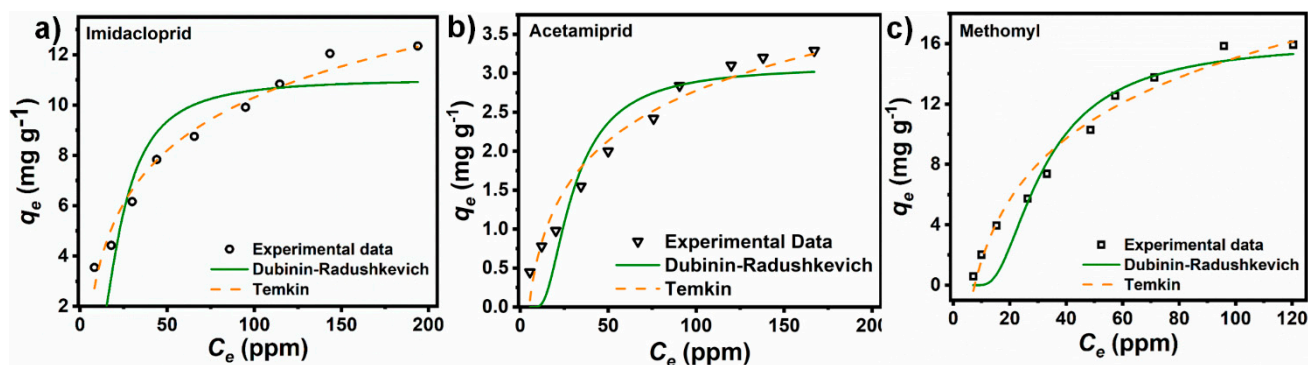

**Figure S1.** Dubinin-Radushkevich adsorption isotherms for (a) imidacloprid, (b) acetamiprid and (c) methomyl on BC, respectively.

**Table S1.** Dubinin-Radushkevich and Temkin isotherm parameters for imidacloprid, acetamiprid and methomyl on BC.

| Models<br>(Two-parameter) | Isotherm parameters                            | Pesticides           |                      |                      |
|---------------------------|------------------------------------------------|----------------------|----------------------|----------------------|
|                           |                                                | Imidacloprid         | Acetamiprid          | Methomyl             |
| Dubinin–Radushkevich      | $q_{mDR} \text{ (mg g}^{-1}\text{)}$           | 11.04                | 3.09                 | 16.15                |
|                           | $K_{DR} \text{ (mol}^2 \text{ J}^{-2}\text{)}$ | $6.9 \times 10^{-7}$ | $1.1 \times 10^{-6}$ | $1.3 \times 10^{-6}$ |
|                           | $E \text{ (kJ mol}^{-1}\text{)}$               | 0.8509               | 0.6273               | 0.6689               |
|                           | $R^2$                                          | 0.7407               | 0.8735               | 0.9350               |
| Temkin                    | $K_T \text{ (L g}^{-1}\text{)}$                | 0.2967               | 0.2005               | 0.1320               |
|                           | $B$                                            | 3.0403               | 0.9260               | 5.840                |
|                           | $b_T \text{ (kJ mol}^{-1}\text{)}$             | 0.8150               | 2.6757               | 0.4243               |
|                           | $R^2$                                          | 0.9625               | 0.9770               | 0.9742               |

### Supplementary Materials References

1. Foo, K. Y.; Hameed, B. H. Insights into the modeling of adsorption isotherm systems. *Chem. Eng. J.* **2010**, *156*, 2–10.
2. Mohammad, S. G.; Ahmed, S. M.; Badawi, A. F. M. A comparative adsorption study with different agricultural waste adsorbents for removal of oxamyl pesticide. *Desalin. Water Treat.* **2015**, *55*, 2109–2120.
